# Supplementary material
Source: publisher figshare collection journal article supplement (https://plos.figshare.com/articles/dataset/_/5521018)
Supplement: Supplementary file 1 [file 1 › S3 Text.pdf]

# **External Auditory Exostoses and Hearing Loss in the Shanidar 1 Neandertal**

## **Supporting Information Appendices**

**Erik Trinkaus<sup>1</sup> and Sébastien Villotte<sup>2</sup>**

<sup>a</sup> Department of Anthropology, Washington University, Saint Louis MO 63130, USA

<sup>b</sup> UMR5199 PACEA, Université de Bordeaux – CNRS, Bâtiment B8, Allée Geoffroy Saint Hilaire, CS 50023, 33615 Pessac cedex, France

### **S3 Text: Differential diagnosis**

The differential diagnosis for EAE includes osteomata. These sutural protrusions are pedunculated bone formations, usually solitary and unilateral [1,2]. Figure S14 illustrates probable cases of osteomata (black arrow) along the tympanosquamous suture, associated with a modest external auditory exostosis (white arrow) on the anteroinferior tympanic bone. The probable osteomata were mistakenly presented by Villotte and Knüsel [3] as external auditory exostoses.

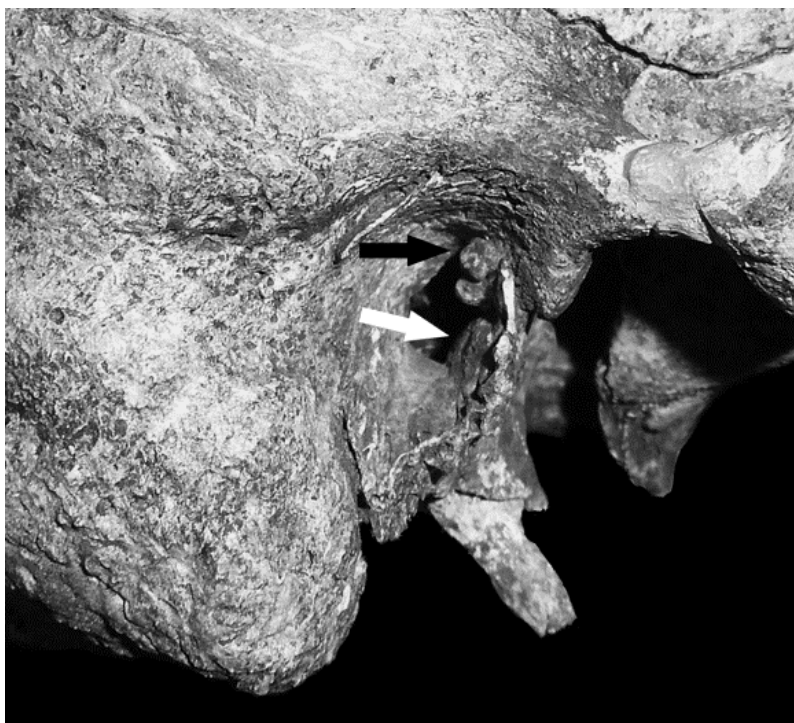

**S14 Fig. Recent human right temporal bone with osteomata (black arrow) and an external auditory exostosis (white arrow).**

### **S3 References**

1. Graham MD. Osteomas and exostoses of the external auditory canal. A clinical, histopathologic and scanning electron microscopic study. *Ann Otol Rhinol Laryngol.* 1979; 88: 566–72.
2. Leonetti JP, Marzo SJ. Diseases of the external auditory canal. In: Pensak ML, Choo DI, editors. *Clinical Otology*, 4th ed. New York: Thieme; 2015. p. 181-91.
3. Villotte S, Knüsel CJ. External auditory exostoses and prehistoric aquatic resource procurement. *J Archaeol Sci Rep.* 2016; 6(4):633-6.
